# Supplementary material
Source: bioRxiv or medRxiv preprint supplement (https://www.biorxiv.org/highwire/filestream/83314/field_highwire_adjunct_files/4/271361-5.pdf)
Supplement: Supplementary file [file 271361-5.pdf]

Chemical similarity (CSCSmrca)

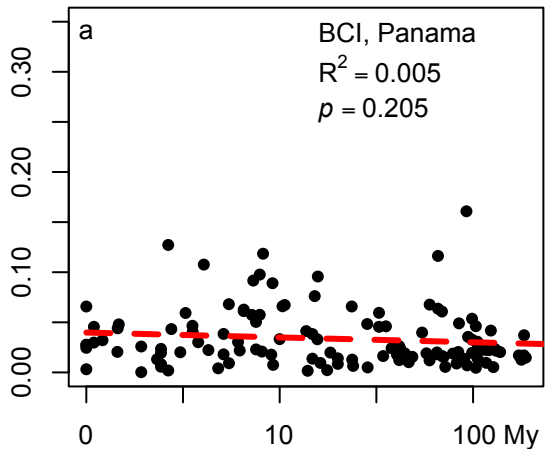

Phylogenetic distance

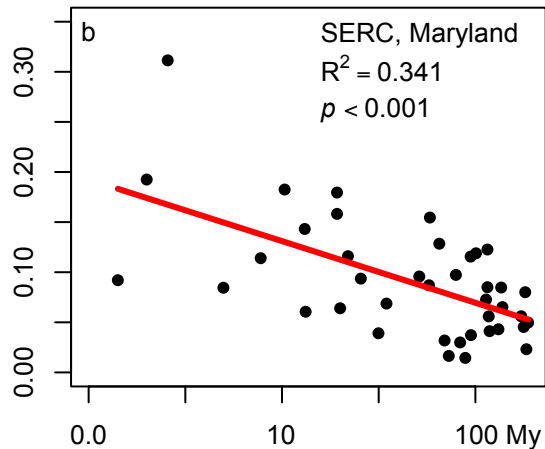

Phylogenetic distance
